# Supplementary material for: Extracellular vesicles derived from M1 macrophages deliver miR-146a-5p and miR-146b-5p to suppress trophoblast migration and invasion by targeting TRAF6 in recurrent spontaneous abortion
Source: Theranostics. 2021 Mar 31;11(12):5813–30. doi: 10.7150/thno.58731 (PMC8058722; doi:10.7150/thno.58731)
Supplement: Supplementary file 1 — Supplementary figures and tables. [file thnov11p5813s1.pdf]

## Supplementary Table

**Table S1. Comparison of the Baseline Data between Control Group and RSA Group.**

| Parameter                | Control (n = 20) | RSA (n = 34) |
|--------------------------|------------------|--------------|
| Age (years)              | 30.16±2.83       | 30.28±4.23   |
| BMI (kg/m <sup>2</sup> ) | 21.57±2.66       | 21.40±4.61   |
| Gestation week           | 8.53±1.38        | 9.02±1.18    |
| Number of miscarriage    | 0.72±0.20        | 2.45±0.32**  |
| Number of live birth     | 1.62±0.40        | 0.00±0.00**  |

Notes: \*\* $P < 0.01$ . Abbreviations: RSA, recurrent spontaneous abortion; BMI, body mass index.

**Table S2. The Sequences of Primers for Quantitative RT-PCR.**

| Gene          | Primer Sequence                   |
|---------------|-----------------------------------|
| IL-6          | F: 5`-ACTCACCTCTTCAGAACGAATTG -3` |
|               | R: 5`-CCATCTTTGGAAGGTTTCAGGTTG-3` |
| TNF- $\alpha$ | F: 5`-TCTCGAACCCCGAGTGACAA-3`     |
|               | R: 5`-TGAAGAGGACCTGGGAGTAG-3`     |
| IFN- $\beta$  | F: 5`-ATGACCAACAAGTGTCTCCTCC-3`   |
|               | R: 5`-GGAATCCAAGCAAGTTGTAGCTC-3`  |
| N-cadherin    | F: 5`-TCAGGCGTCTGTAGAGGCTT-3`     |
|               | R: 5`-ATGCACATCCTTCGATAAGACTG -3` |
| E-cadherin    | F: 5`-ATTTTTCCCTCGACACCCGAT-3`    |
|               | R: 5`- TCCCAGGCGTAGACCAAGA-3`     |
| vimentin      | F: 5`-AGTCCACTGAGTACCGGAGAC-3`    |
|               | R: 5`- CATTTCACGCATCTGGCGTTC-3`   |
| GAPDH         | F: 5`-GCACCACCAACTGCTTAGCA-3`     |
|               | R: 5`-GTCTTCTGGGTGGCAGTGATG-3`    |

**Table S3. The expression abundance of miRNAs in M1-EVs.**

| <b>miRNA profile</b> | <b>Sample 1</b> | <b>Sample 2</b> | <b>Sample 3</b> |
|----------------------|-----------------|-----------------|-----------------|
| hsa-miR-146a-5p      | 938617          | 431209          | 471598          |
| hsa-miR-92a-3p       | 638750          | 106484          | 50822           |
| hsa-miR-24-3p        | 285214          | 76071           | 51707           |
| hsa-miR-146b-5p      | 133509          | 68596           | 56170           |
| hsa-miR-21-5p        | 274093          | 48741           | 28220           |
| hsa-miR-221-3p       | 176843          | 42658           | 37752           |
| hsa-miR-378a-3p      | 97312           | 29625           | 50595           |
| hsa-miR-222-3p       | 163596          | 20344           | 9609            |
| hsa-miR-148a-3p      | 78001           | 17957           | 28991           |
| hsa-miR-320a-3p      | 87061           | 21200           | 10762           |
| hsa-miR-27a-3p       | 80344           | 16448           | 12655           |
| hsa-miR-23a-3p       | 40452           | 12561           | 23690           |
| hsa-miR-155-5p       | 41894           | 17151           | 16865           |
| hsa-miR-30d-5p       | 46256           | 18951           | 8290            |
| hsa-miR-423-5p       | 81411           | 12756           | 3611            |
| hsa-miR-1246         | 10548           | 4779            | 26731           |
| hsa-let-7a-5p        | 68696           | 7603            | 5012            |
| hsa-miR-25-3p        | 41061           | 9156            | 7320            |
| hsa-miR-30c-5p       | 23617           | 8874            | 10089           |
| hsa-let-7i-5p        | 33691           | 7468            | 6867            |

## Supplementary Figure

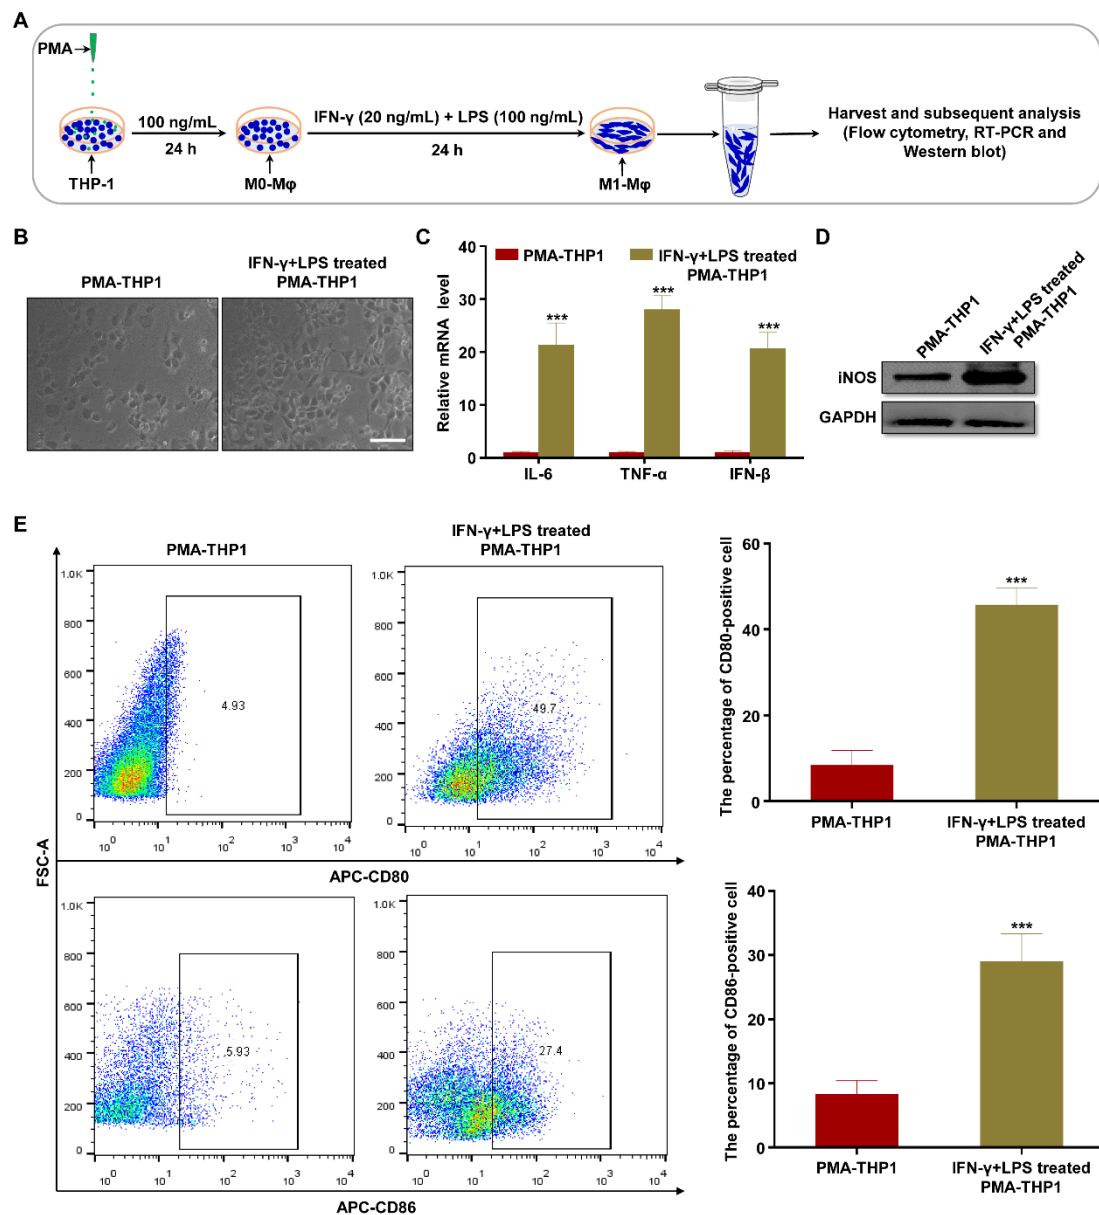

**Figure S1. Induction and identification of M1 macrophages.** (A) Schematic diagram of M1 macrophage induction process. THP-1 cells were cultured in 50 ng/mL PMA for 24 h, and then stimulated with 100 ng/mL LPS plus 20 ng/mL IFN- $\gamma$  for 24 h. (B) The representative bright-field images of macrophages treated by the respective conditioned media are shown (magnification,  $\times 200$ ). (C) RT-PCR assays of IL-6, TNF- $\alpha$  and IFN- $\beta$  mRNAs in PMA-THP1 and IFN- $\gamma$  + LPS-treated PMA-THP1. (D) Western blotting analysis of iNOS protein levels in PMA-THP1 and IFN- $\gamma$  + LPS-treated PMA-THP1. (E) Flow cytometry for analyzing the expression of CD80 and CD86 in PMA-THP1 and IFN- $\gamma$  + LPS-treated PMA-THP1. Error bars, SD. \*\*\* $P < 0.001$ .

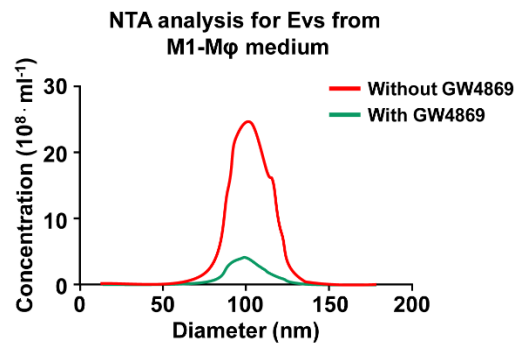

**Figure S2.** NTA of the size distribution and concentration of EVs from equal volume of culture medium of M1-M $\phi$  pretreated with or without GW4869.

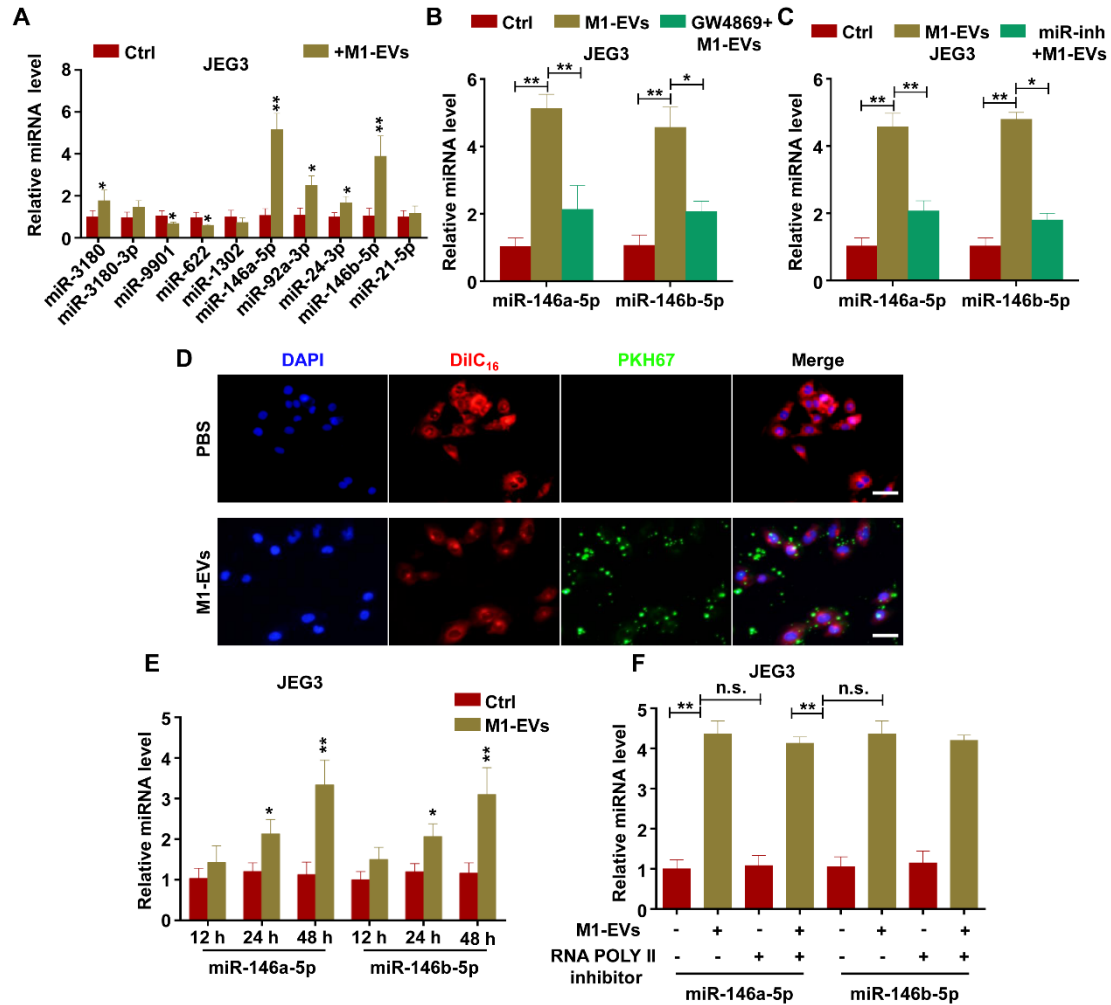

**Figure S3. M1-EVs transport miR-146a-5p and miR-146b-5p into JEG3.** (A) The expression of miR-146a-5p and miR-146b-5p detected by RT-PCR in JEG3, JEG3 treated with M1-EVs or EVs from M1-Mφ treated with GW4869. (B) The expression of miR-146a-5p and miR-146b-5p were detected by RT-PCR in JEG3, JEG3 treated with M1-EVs or EVs from M1-Mφ treated with inhibitors of miR-146a-5p or miR-146b-5p. (C) JEG3 was incubated with PKH67-labeled EVs from M1-Mφ for 12 h, 24 h and 48 h. The green EVs signal was detected by confocal microscopy (scale bar, 20 μm). (D) The expression of miR-146a-5p and miR-146b-5p were detected by RT-PCR. (E) JEG3 were treated with polymerase II inhibitors (20 mM) for 3 h and then incubated with M1-EVs. Levels of miR-146a-5p and miR-146b-5p were assessed by RT-PCR. Error bars, SD. \* $P < 0.05$ , \*\* $P < 0.01$ ; n.s., not significant.

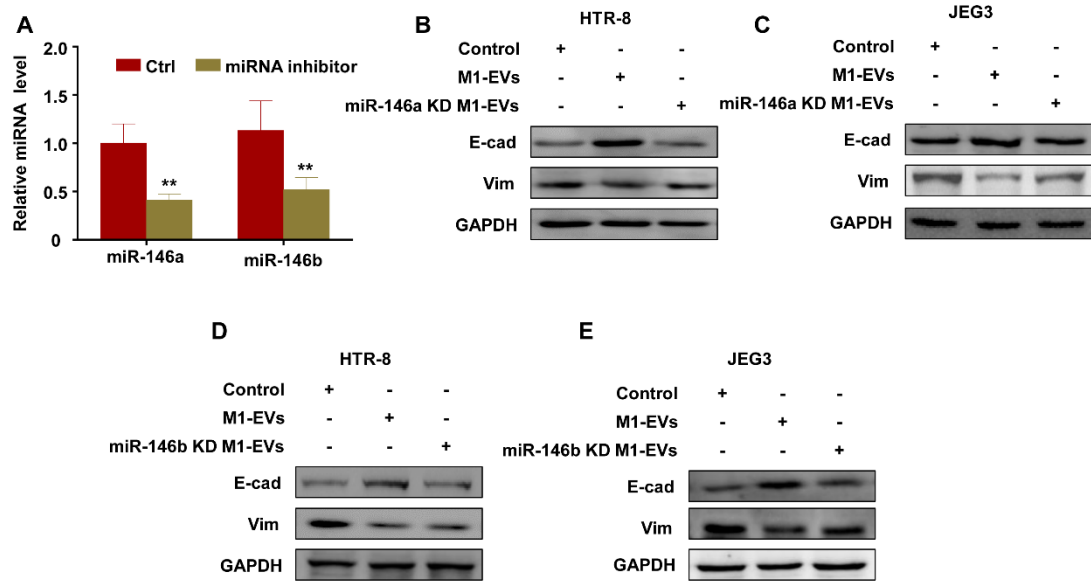

**Figure S4. The effect of miR-146a-5p and miR-146b-5p knockdown in M1-Mφ on EMT of trophoblasts.** (A) The expression of miR-146a-5p and miR-146b-5p detected by RT-PCR in M1-Mφ treated with corresponding adenovirus. (B-C) Levels of E-cad and Vim protein were analyzed by western blotting at 48 h post-transfection. (D-E) Levels of E-cad and Vim protein were analyzed by western blotting at 48 h post-transfection. Error bars, SD. \*\* $P < 0.01$ .

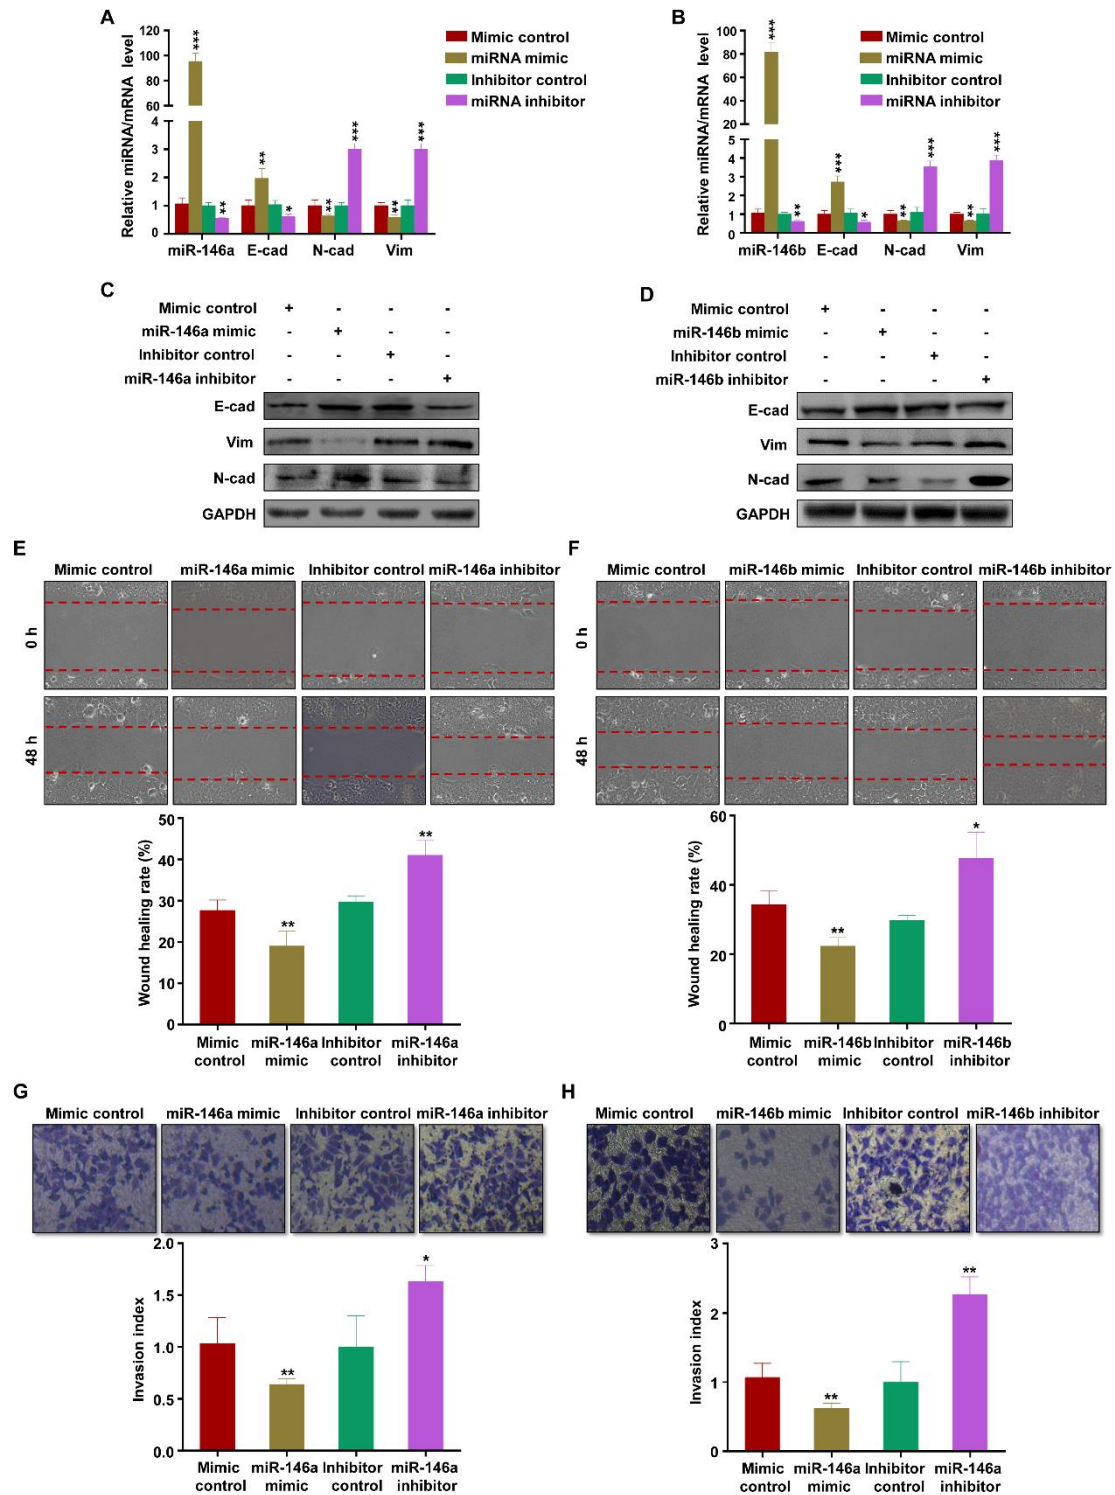

**Figure S5. MiR-146a-5p and miR-146b-5p suppress EMT, migration and invasion of JEG3.** (A-B) JEG3 was transfected with miR-146a-5p or miR-146b-5p mimics or inhibitor, respectively. The levels of miR-146a-5p or miR-146b-5p, and E-cadherin (E-cad), N-cadherin (N-cad), and vimentin (Vim) were analyzed by RT-PCR at 48 h post transfection. (C-D) Levels of E-cad, N-cad and Vim protein were analyzed by western blotting at 48 h post-transfection. (E-H) The migration and invasion capacity of JEG3 alone or co-cultured with M1-EVs was determined by the wound healing assay and

transwell coculture system, respectively. Representative photographs of migratory or invaded cells (magnification,  $\times 200$ ) are shown. Error bars, SD. \* $P < 0.05$ , \*\* $P < 0.01$ , \*\*\* $P < 0.001$ .

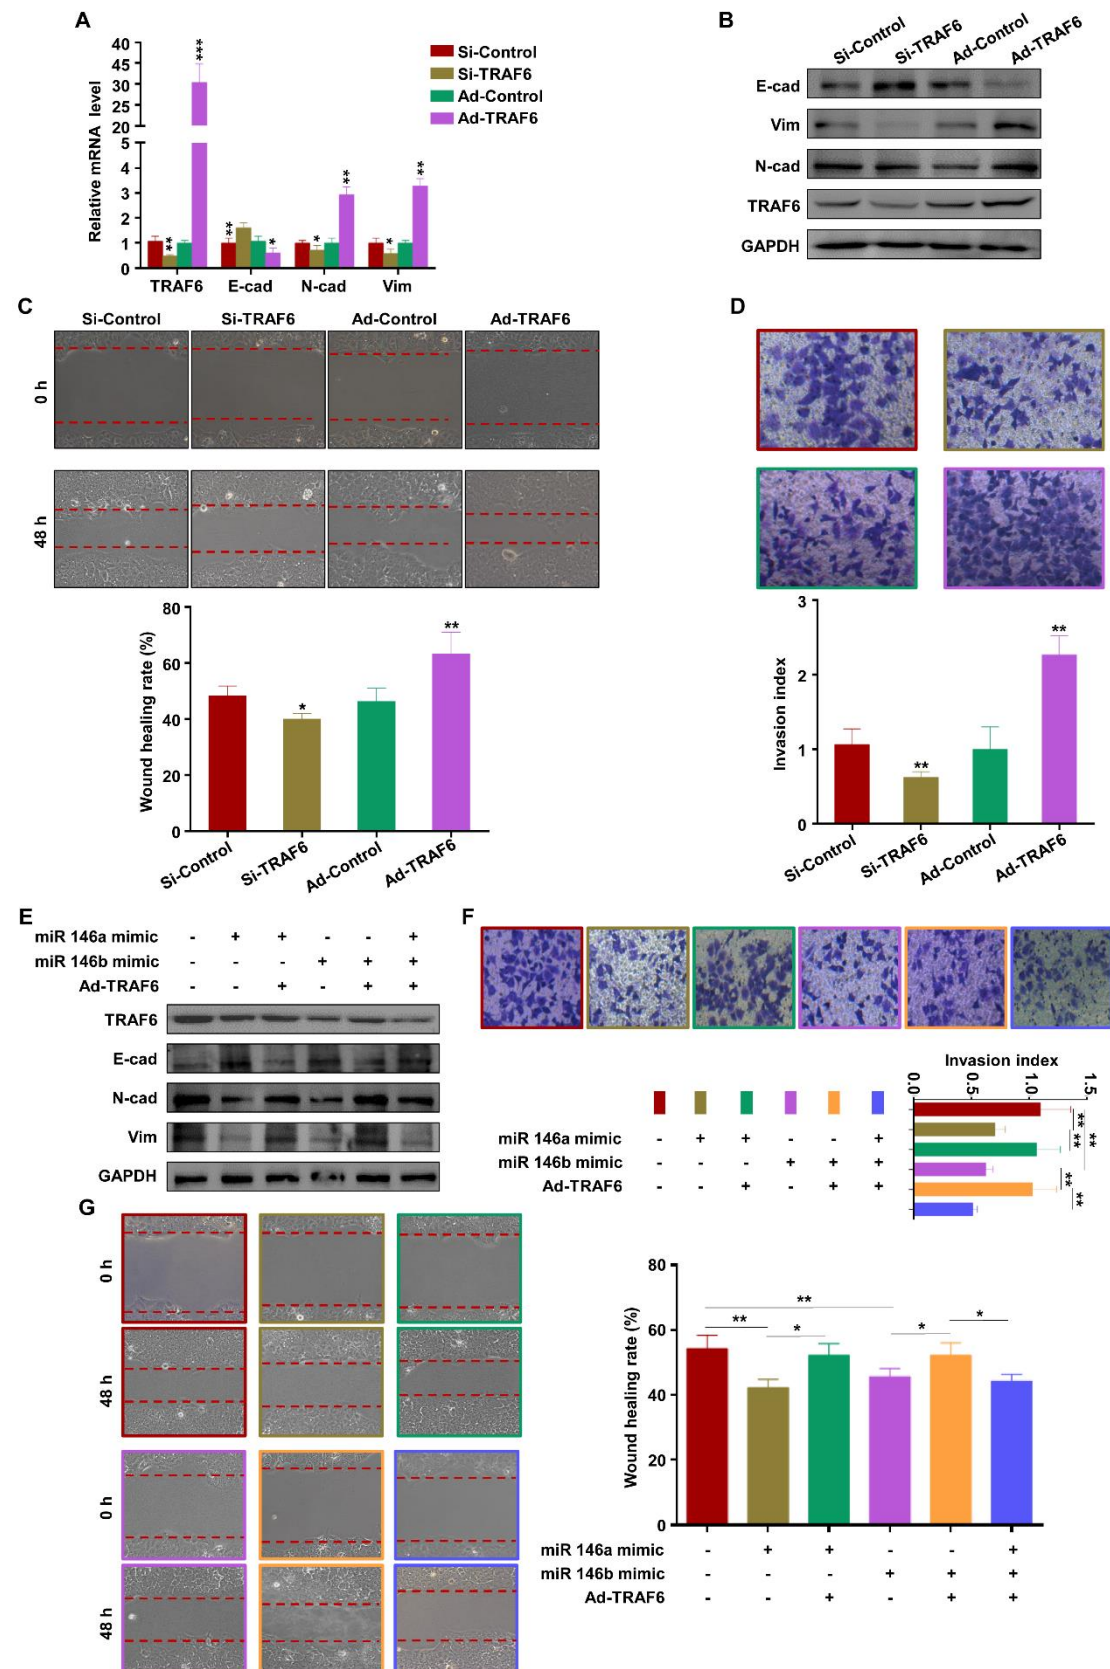

**Figure S6. MiR-146a-5p and miR-146b-5p suppress EMT, migration and invasion of JEG3 by down-regulating TRAF6 expression.** (A) JEG3 was transfected with si-TRAF6 or Ad-TRAF6, respectively. The levels of TRAF6, E-cadherin (E-cad), N-cadherin (N-cad), and vimentin (Vim) were analyzed by RT-PCR at 48 h post-transfection. (B) Levels of TRAF6 protein in JEG3 were analyzed by western blotting at 48 h post-transfection. (C-D) The migration and invasion capacity of JEG3 transfected with si-TRAF6 or Ad-TRAF6 was determined by the wound healing assay and transwell co-culture system, respectively. Representative photographs of migratory or invaded cells (magnification,  $\times 200$ ) are shown. (E) JEG3 transfected with miR-146a-5p mimics alone or in combination with miR-146a-5p or Ad-TRAF6 were subjected to western blotting at 72 h post-transfection. (F-G) The migration and invasion capacity of JEG3 was determined by the wound healing assay and transwell co-culture system, respectively. Representative photographs of migratory or invaded cells (magnification,  $\times 200$ ) are shown. Error bars, SD. \* $P < 0.05$ , \*\* $P < 0.01$ , \*\*\* $P < 0.001$ .
